# Supplementary material for: Effects of 1α,25-Dihydroxyvitamin D3 on the Pharmacokinetics of Procainamide and Its Metabolite N-Acetylprocainamide, Organic Cation Transporter Substrates, in Rats with PBPK Modeling Approach
Source: MDPI journal article supplement (doi:10.3390/pharmaceutics13081133), 2021-07-25
Supplement: s1 [file s1]

# Supplementary Material: Effects of $1\alpha,25$ -Dihydroxyvitamin D<sub>3</sub> on the Pharmacokinetics of Procainamide and Its Metabolite N-Acetylprocainamide, Organic Cation Transporter Substrates, in Rats with PBPK Modeling Approach

Anusha Balla, Yoo-Seong Jeong, Hyojung Kim, Yunjong Lee, Suk-Jae Chung, Yoon-Jee Chae and Han-Joo Maeng

```
*****
C          ADAPT          *
C          Version 5      *
C*****
C          *
C          MODEL          *
C          *
C          *
C  This file contains Fortran subroutines into which the user *
C  must enter the relevant model equations and constants.    *
C  Consult the User's Guide for details concerning the format for *
C  entered equations and definition of symbols.               *
C          *
C  1. Symbol- Parameter symbols and model constants          *
C  2. DiffEq- System differential equations                   *
C  3. Output- System output equations                         *
C  4. Varmod- Error variance model equations                 *
C  5. Covmod- Covariate model equations (ITS,MLEM)           *
C  6. Popinit- Population parameter initial values (ITS,MLEM) *
C  7. Prior - Parameter mean and covariance values (ID,NPD,STS) *
C  8. Sparam- Secondary parameters                           *
C  9. Amat - System state matrix                             *
C          *
C*****
C#####C
C          Subroutine SYMBOL
C          Implicit None
C          Include 'globals.inc'
C          Include 'model.inc'
CC
C-----C
C  Enter as Indicated          C
C---C-----C
C          NDEqs = 46 ! Enter # of Diff. Eqs.
```

```

NSParam = 1 ! Enter # of System Parameters.
NVparam = 2 ! Enter # of Variance Parameters.
NSecPar = 0 ! Enter # of Secondary Parameters.
NSecOut = 0 ! Enter # of Secondary Outputs (not used).
Ieqsol = 1 ! Model type: 1 - DIFFEQ, 2 - AMAT, 3 - OUTPUT only.
Descr = ' Insert Model File Description '

CC
C-----C
C Enter Symbol for Each System Parameter (eg. Psym(1)='Kel') C
C---c-----C
      Psym(1) = 'ROCT'
CC
C-----C
C Enter Symbol for Each Variance Parameter {eg: PVsym(1)='Sigma'} C
C---c-----C
      PVsym(1)='Sigma'
      PVsym(2)='Intercept'
CC
C-----C
C Enter Symbol for Each Secondary Parameter {eg: PSsym(1)='CLt'} C
C---c-----C
C-----C
C-----C
C
      Return
      End
C#####C
      Subroutine DIFFEQ(T,X,XP)
      Implicit None
      Include 'globals.inc'
      Include 'model.inc'
      Real*8 T,X(MaxNDE),XP(MaxNDE)
      Real*8 RMATE, CLintK, NCLintK, FORM, CLintL, NCLintL
      Real*8 QG, Q, QL, QB, QK, QH, QS, QI, QM, QA, QSk, QBo, QC
      Real*8 VL, VB, VK, VH, VG, VS, VI, VM, VA, VSk, VBo, VVE, VAR
      Real*8 SK, PP, PK, NPK
      Real*8 KpL, KpG, KpB, KpH, KpK, KpM, KpS, KpI, KpA, KpBo, KpSk
      Real*8 NKpL, NKpG, NKpB, NKpH, NKpK, NKpM, NKpS, NKpI, NKpA
      Real*8 Nfup, fup, GFR, NKpBo, NKpSk
      Real*8 QS2, QS3, QS4, Qloh, QCD, QU, FractionGFRVol
      Real*8 Vglm, Vrbl, VS1, VS2, VS3, VS4, Vloh, Vcd, Vu, Vptc
      Real*8 CLrabs, NCLrabs, MW, NMW, Dose, ROCT

```

CC

C-----C

C Enter Differential Equations Below {e.g.  $XP(1) = -P(1)*X(1)$ } C

C-----C

$$ROCT = P(1)$$

$$RMATE = 0.312$$

$$CLintK = 4.67 * RMATE$$

$$NCLintK = 9.16 * RMATE$$

$$FORM = 0.845$$

$$QG=80$$

$$Q=80$$

$$QL=80*24.2/100$$

$$QB=80*1.4/100$$

$$QK=80*14.5/100$$

$$QH=80*4/100$$

$$QS=80*1.1/100$$

$$QI=80*10.1/100$$

$$QM=80*23.7/100$$

$$QA=80*5.9/100$$

$$QSk=80*5.1/100$$

$$QBo=80*10.1/100$$

$$VL=8.57$$

$$VB=1.24$$

$$VK=2.19$$

$$VH=1.05$$

$$VG=1.24$$

$$VS=0.57$$

$$VI=6.19$$

$$VM=116.13$$

$$VA=16.66$$

$$VSk=39.4$$

$$VBo=15.7$$

$$VVE=15.32*2/3$$

$$VAR=15.32*1/3$$

$$SK=397000$$

$$PP=0.00000031$$

$$PK = (0.0000009 - PP)*ROCT + PP$$

$$NPK = (0.000000391 - PP)*ROCT + PP$$

$$KpL = 0.649$$

$$KpG = 0.9282$$

$$KpB = 0.2861$$

$$KpH = 1.6583$$

$$KpK = PK/PP*3.91$$

$$KpM = 3.93$$

$$KpS = 1.507$$

$$KpI = 4.87$$

$$KpA = 0.721$$

$$KpBo = 1.96$$

$$KpSk = 2.96$$

$$NKpL=7.25$$

$$NKpG = 4.191$$

$$NKpB = 0.2458$$

$$NKpH = 2.290$$

$$NKpK = NPK/PP*11.7$$

$$NKpS = 5.186$$

$$NKpI = 6.23$$

$$NKpA = 0.967$$

$$NKpBo = 2.2$$

$$NKpSk = 3.64$$

$$NKpM = 4.61$$

$$Nfup = 0.688$$

$$fup=0.87$$

$$GFR = 1.31$$

$$CLintL=25$$

$$NCLintL=4.04$$

$$QC=Q-(QK+QL+QB+QH+QM+QA+QSK+QBO)$$

$$QS2 = GFR*0.85$$

$$QS3 = GFR*0.70$$

$$QS4 = GFR*0.55$$

$$Qloh = GFR*0.33$$

$$QCD = GFR*0.18$$

$$QU = GFR*0.02$$

$$\text{FractionGFRVol} = GFR/QK$$

$$Vglm = 0.08$$

$$Vrbl = 0.375$$

$$VS1 = Vglm*\text{FractionGFRVol}$$

$$VS2 = Vglm*\text{FractionGFRVol}*0.85$$

$$VS3 = V_{glm} * \text{FractionGFRVol} * 0.70$$

$$VS4 = V_{glm} * \text{FractionGFRVol} * 0.55$$

$$V_{loh} = V_{glm} * \text{FractionGFRVol} * 0.33$$

$$V_{cd} = V_{glm} * \text{FractionGFRVol} * 0.18$$

$$V_u = 1.44$$

$$V_{ptc} = 1.03$$

$$CL_{rabs} = 0.96 * Q_{loh}$$

$$NCL_{rabs} = 0.96 * Q_{loh}$$

$$MW = 235.325$$

$$NMW = 277.362$$

$$XP(1) = (QC * X(3) + QL * X(4) / K_{pL} + QB * X(5) / K_{pB} + (QK - QU) * X(19)$$

$$1 + QH * X(7) / K_{pH} + QM * X(10) / K_{pM} + QA * X(11) / K_{pA} + QSk * X(12) / K_{pSk}$$

$$1 + QBo * X(13) / K_{pBo} - QG * X(1) ) / VVE$$

$$XP(2) = QG * (X(1) - X(2) / KPG) / VG$$

$$XP(3) = QG * (X(2) / KPG - X(3)) / VAR$$

$$XP(4) = (QL * (X(3) - QS * (X(3) - X(8) / KPS) + QI * (X(3) - X(9) / KPI)) / (QL$$

$$1 - X(4) / K_{pL} - CL_{intL} * fup / K_{pL} * X(4)) / VL$$

$$XP(5) = QB * (X(3) - X(5) / K_{pB}) / VB$$

$$XP(6) = (fup * PK * 60 * SK * V_{ptc} * (X(19) - X(6) / K_{pK}) + CL_{rabs} * X(18)$$

$$1 - CL_{intK} * fup / 3.91 * X(6)) / V_{ptc}$$

$$XP(7) = QH * (X(3) - X(7) / K_{pH}) / VH$$

$$XP(8) = QS * (X(3) - X(8) / KPS) / VS$$

$$XP(9) = QI * (X(3) - X(9) / KPI) / VI$$

$$XP(10) = QM * (X(3) - X(10) / K_{pM}) / VM$$

$$XP(11) = QA * (X(3) - X(11) / K_{pA}) / VA$$

$$XP(12) = QSk * (X(3) - X(12) / K_{pSk}) / VSk$$

$$XP(13) = QBo * (X(3) - X(13) / K_{pBo}) / VBo$$

$$XP(14) = QK * (X(3) - X(14)) / V_{glm}$$

$$XP(15) = (fup * GFR * X(14) - QS2 * X(15)) / VS1$$

$$XP(16) = (QS2 * X(15) - QS3 * X(16)) / VS2$$

$$XP(17) = (QS3 * X(16) - QS4 * X(17)) / VS3$$

$$XP(18) = (QS4 * X(17) - Q_{loh} * X(18) + CL_{intK} * fup / 3.91 * X(6)$$

$$1 - CL_{rabs} * X(18)) / VS4$$

$$XP(19) = ((QK - fup * GFR) * X(14) - fup * PK * 60 * SK * V_{ptc} * (X(19)$$

$$1 - X(6) / K_{pK}) - (QK - QU) * X(19)) / V_{rbl}$$

$$XP(20) = (Q_{loh} * X(18) - QCD * X(20)) / V_{loh}$$

$$XP(21) = (QCD * X(20) - QU * X(21)) / V_{cd}$$

$$XP(22) = QU * (X(21) - X(22)) / V_u$$

$$XP(23) = QU * X(22)$$

$$XP(24) = (QC * X(26) + QL * X(27) / NK_{pL} + QB * X(28) / NK_{pB} + (QK - QU) * X(42)$$

```

1  + QH*X(30)/NKpH + QM*X(33)/NKpM + QA*X(34)/NKpA + QSk*X(35)/NKpSk
1  + QBo*X(36)/NKpBo - QG*X(24))/VVE
XP(25) = QG*(X(24)-X(25)/NKPG)/VG
XP(26) = QG*(X(25)/NKPG-X(26))/VAR
XP(27) = (FORM*CLintL*fup/KpL*X(4)*NMW/MW + QL*( X(26)-(
1  QS*(X(26)-X(31)/NKPS)+ QI*(X(26)-X(32)/NKPI))/(QL) -X(27)/NKpL)
1  -NCLintL*Nfup/NKpL*X(27) )/VL
XP(28) = QB*(X(26)-X(28)/NKPB)/VB
XP(29) = (Nfup*NPK*60*SK*Vptc* ( X(42) - X(29)/NKpK )
1  + NCLrabs*X(41) - NCLintK*Nfup/11.7*X(29))/Vptc
XP(30) = QH*(X(26)-X(30)/NKPH)/VH
XP(31) = QS*(X(26)-X(31)/NKPS)/VS
XP(32) = QI*(X(26)-X(32)/NKPI)/VI
XP(33) = QM*(X(26)-X(33)/NKPM)/VM
XP(34) = QA*(X(26)-X(34)/NKPA)/VA
XP(35) = QSk*(X(26)-X(35)/NKPSk)/VSk
XP(36) = QBo*(X(26)-X(36)/NKpBo)/VBo
XP(37) = QK*(X(24)-X(37))/Vglm
XP(38) = ( Nfup*GFR*X(37) - QS2*X(38) ) / VS1
XP(39) = ( QS2*X(38) - QS3*X(39) ) / VS2
XP(40) = ( QS3*X(39) - QS4*X(40) ) / VS3
XP(41) = ( QS4*X(40) - Qloh*X(41) + NCLintK*Nfup/11.7*X(29)
1  - NCLrabs*X(41) ) / VS4
XP(42) = (( QK - Nfup*GFR ) * X(37) - Nfup*NPK*60*SK*Vptc*
1  ( X(42) - X(29)/NKpK ) - (QK-QU) * X(42) ) / Vrbl
XP(43) = ( Qloh*X(41) - QCD*X(43) ) / Vloh
XP(44) = ( QCD*X(43) - QU*X(44) ) / Vcd
XP(45) = QU*( X(44) - X(45) ) / Vu
XP(46) = QU*X(45)

```

C-----C

C-----C

C

Return

End

C#####C

Subroutine OUTPUT(Y,T,X)

Implicit None

Include 'globals.inc'

Include 'model.inc'

```

      Real*8 Y(MaxNOE),T,X(MaxNDE)
      Real*8 Dose, MW, NMW

CC
C-----C
C   Enter Output Equations Below   {e.g.  Y(1) = X(1)/P(2) }           C
C---c-----C
      Dose = 2500
      MW=235.325
      NMW=277.362

      Y(1) = X(23)/Dose * 100
      Y(2) = X(46)/(Dose*NMW/MW)*100
      Y(3) = X(1)
      Y(4) = X(24)
C-----C
C-----C
C
      Return
      End
C#####C
      Subroutine VARMOD(V,T,X,Y)
      Implicit None
      Include 'globals.inc'
      Include 'model.inc'
      Real*8 V(MaxNOE),T,X(MaxNDE),Y(MaxNOE), Sigma, Intercept
CC
C-----C
C   Enter Variance Model Equations Below                               C
C      {e.g. V(1) = (PV(1) + PV(2)*Y(1))**2 }                         C
C---c-----C
      Sigma = PV(1)
      Intercept = PV(2)
      V(1) = ( Intercept + Sigma*Y(1) ) ** 2
      V(2) = ( Intercept + Sigma*Y(2) ) ** 2
      V(3) = ( Intercept + Sigma*Y(3) ) ** 2
      V(4) = ( Intercept + Sigma*Y(4) ) ** 2

C-----C
C-----C
C
      Return
      End

```

```

C#####C
      Subroutine COVMOD(Pmean, ICmean, PC)
C   Defines any covariate model equations (MLEM, ITS)
      Implicit None
      Include 'globals.inc'
      Include 'model.inc'
      Real*8 PC(MaxNCP)
      Real*8 Pmean(MaxNSP+MaxNDE), ICmean(MaxNDE)
CC
C-----C
C   Enter # of Covariate Parameters                                C
C---c-----C
      NCparam = 0      ! Enter # of Covariate Parameters.
CC
C-----C
C   Enter Symbol for Covariate Params {eg: PCsym(1)='CLRenal'}    C
C---c-----C
CC
C-----C
C   For the Model Params. that Depend on Covariates Enter the Equation C
C      {e.g. Pmean(1) =  PC(1)*R(2) }                                C
C---c-----C
C-----C
C-----C
C
      Return
      End
C#####C
      Subroutine POPINIT(PmeanI,ICmeanI,PcovI,ICcovI, PCI)
C   Initial parameter values for population program parameters (ITS, MLEM)
      Implicit None
      Include 'globals.inc'
      Include 'model.inc'
      Integer I,J
      Real*8 PmeanI(MaxNSP+MaxNDE), ICmeanI(MaxNDE)
      Real*8 PcovI(MaxNSP+MaxNDE,MaxNSP+MaxNDE), ICcovI(MaxNDE,MaxNDE)
      Real*8 PCI(MaxNCP)
CC
C-----C
C   Enter Initial Values for Population Means                                C
C      { e.g. PmeanI(1) = 10.0      }                                C
C---c-----C

```

```

CC
C-----C
C  Enter Initial Values for Pop. Covariance Matrix (Lower Triang.)  C
C      {  e.g. PcovI(2,1) = 0.25    }                                C
C---c-----C
CC
C-----C
C  Enter Values for Covariate Model Parameters                        C
C      {  e.g. PCI(1) = 2.0      }                                C
C---c-----C
C-----C
C-----C
C
      Return
      End
C#####C
      Subroutine PRIOR(Pmean,Pcov,ICmean,ICcov)
C  Parameter mean and covariance values for MAP estimation (ID,NPD,STS)
      Implicit None
      Include 'globals.inc'
      Include 'model.inc'
      Integer I,J
      Real*8 Pmean(MaxNSP+MaxNDE), ICmean(MaxNDE)
      Real*8 Pcov(MaxNSP+MaxNDE,MaxNSP+MaxNDE), ICcov(MaxNDE,MaxNDE)
CC
C-----C
C  Enter Nonzero Elements of Prior Mean Vector                        C
C      {  e.g. Pmean(1) = 10.0    }                                C
C---c-----C
CC
C-----C
C  Enter Nonzero Elements of Covariance Matrix (Lower Triang.)      C
C      {  e.g. Pcov(2,1) = 0.25    }                                C
C---c-----C
C-----C
C-----C
C
      Return
      End
C#####C
      Subroutine SPARAM(PS,P,IC)
      Implicit None

```

```

      Include 'globals.inc'
      Real*8 PS(MaxNSECP), P(MaxNSP+MaxNDE), IC(MaxNDE), fdsum, fd1
CC
C-----C
C   Enter Equations Defining Secondary Paramters                C
C       { e.g.  PS(1) = P(1)*P(2)  }                            C
C---c-----C
C-----C
C-----C
C
      Return
      End

C#####C
      Subroutine AMAT(A)
      Implicit None
      Include 'globals.inc'
      Include 'model.inc'
      Integer I,J
      Real*8 A(MaxNDE,MaxNDE)
      DO I=1,Ndeqs
        Do J=1,Ndeqs
          A(I,J)=0.0D0
        End Do
      End Do
CC
C-----C
C   Enter non zero elements of state matrix  {e.g.  A(1,1) = -P(1)}  C
C---c-----C
C-----C
C-----C
C
      Return
      End
C#####C

```
